# Supplementary material
Source: PubMed Central journal article supplement (PMC6884148)

## SUPPLEMENTAL FIGURES AND FIGURE LEGENDS

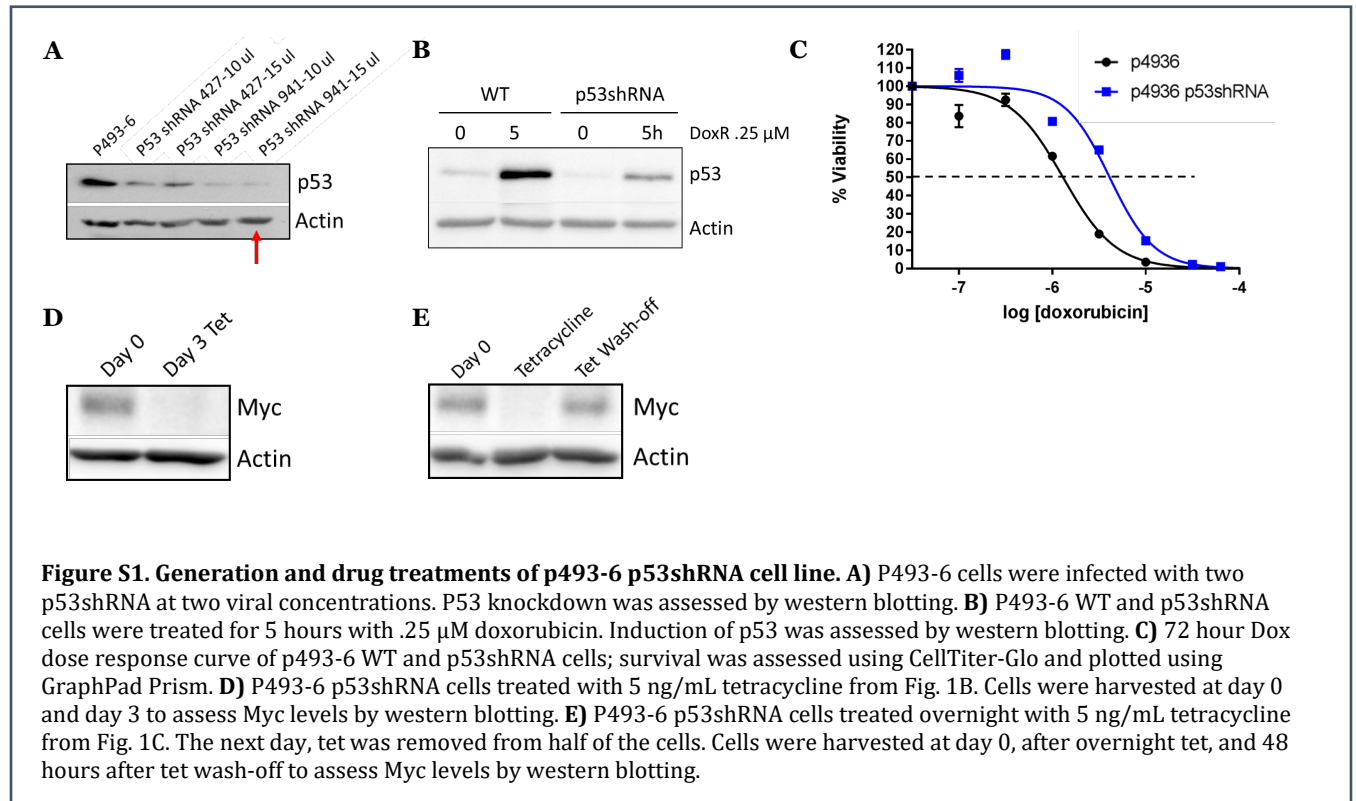

**Figure S2 (following page). GSK-3 $\beta$  inhibition causes transient stabilization of Myc at the protein level and sensitizes multiple Burkitt lymphoma cell lines to chemotherapeutic drugs.** **A)** Ramos cells were treated with LiCl as indicated. Western blotting was performed for  $\beta$ -catenin, Myc, and Myc<sup>Thr58</sup> phosphorylation. **B)** Ramos cells were treated with DMSO or 3  $\mu$ M CHIR99021 for 16 hours followed by actinomycin D. Bar graphs show qRT-PCR for Myc mRNA. **C)** Ramos cells were treated as in B) but followed by cycloheximide treatment. Western blotting was performed for Myc,  $\beta$ -catenin, and GAPDH control. **D)** Ramos cells were treated as in B), stained with PI, Yo-Pro, or TMRE (left, middle, and right columns), and analyzed by flow cytometry. Percentage of cells in each phase of cell cycle are shown (left column). Positive and negative cells are shown for Yo-Pro and TMRE staining. **E)** Ramos cells were treated with DMSO or 3  $\mu$ M CHIR99021 for 2 hours followed by doxorubicin as indicated. Western blotting was performed for cleaved PARP, Myc, and actin control. **F)** Ramos cells were treated with DMSO or 3  $\mu$ M CHIR99021 for 2 hours followed by vincristine. Western blotting was performed for cleaved PARP, Myc<sup>Thr58</sup> phosphorylation, and actin control. **G)** Ramos cells were treated as in E). Cleaved caspase-3 expression was analyzed by flow cytometry after 6.5 hours of doxorubicin; percentages of positive cells are indicated. **H)** Ramos cells were treated as in G). Caspase 3/7 Glo assay was performed and luminescence data points for each treatment group are plotted. **I)** Ramos cells were treated with DMSO or 3  $\mu$ M CHIR99021 for 2 hours followed by a 7.5 hour time course of .1  $\mu$ M vincristine. Caspase 3/7 Glo assay was performed and luminescence data points plotted. **J)** Graph of means  $\pm$  SEM analyzed by unpaired t-test for experimental repeats of Fig. 2C. **K)** Daudi cells were treated and analyzed as in Fig. 2C.

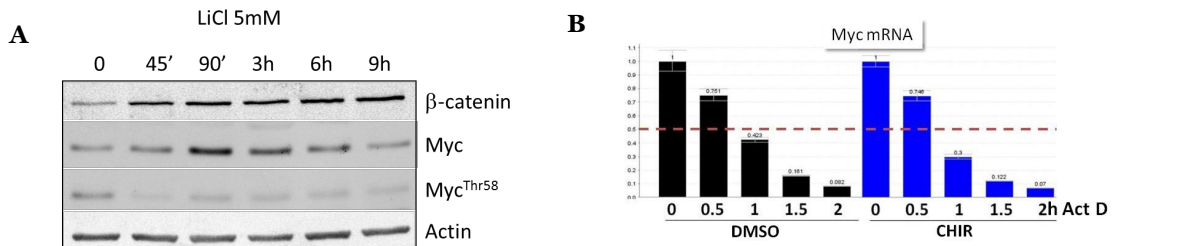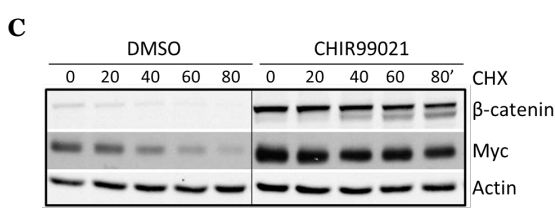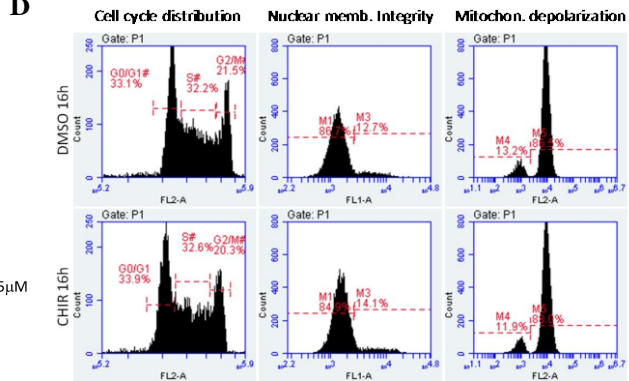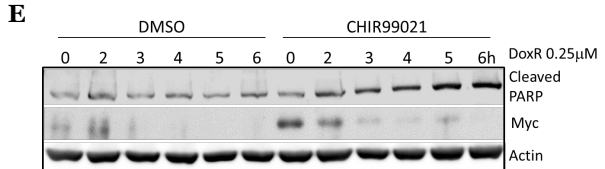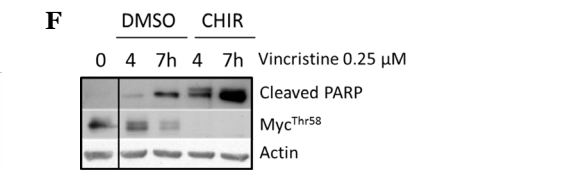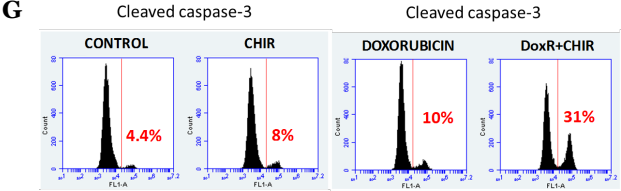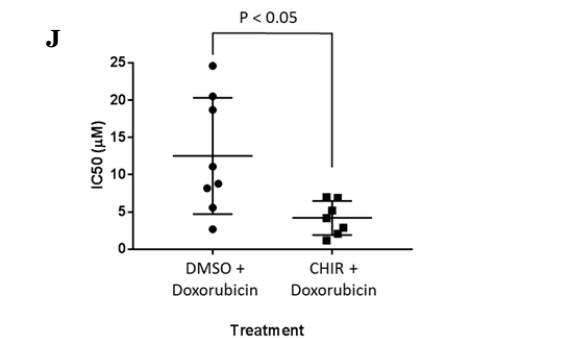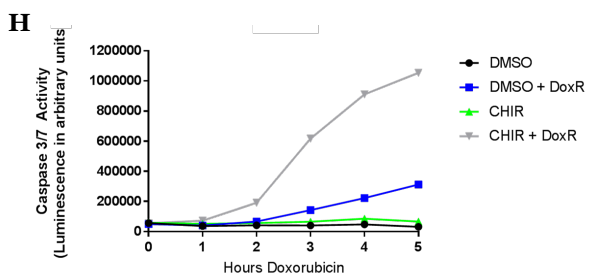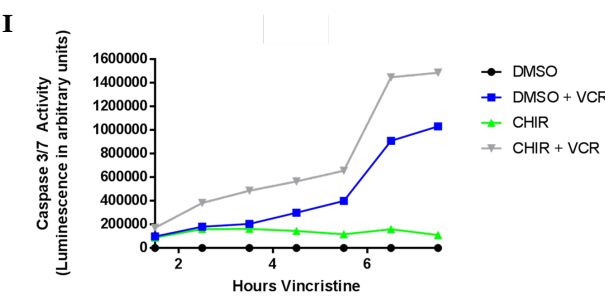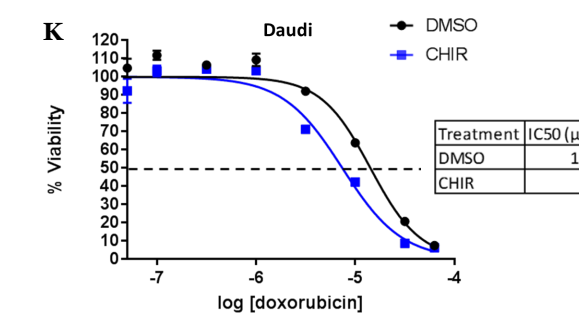

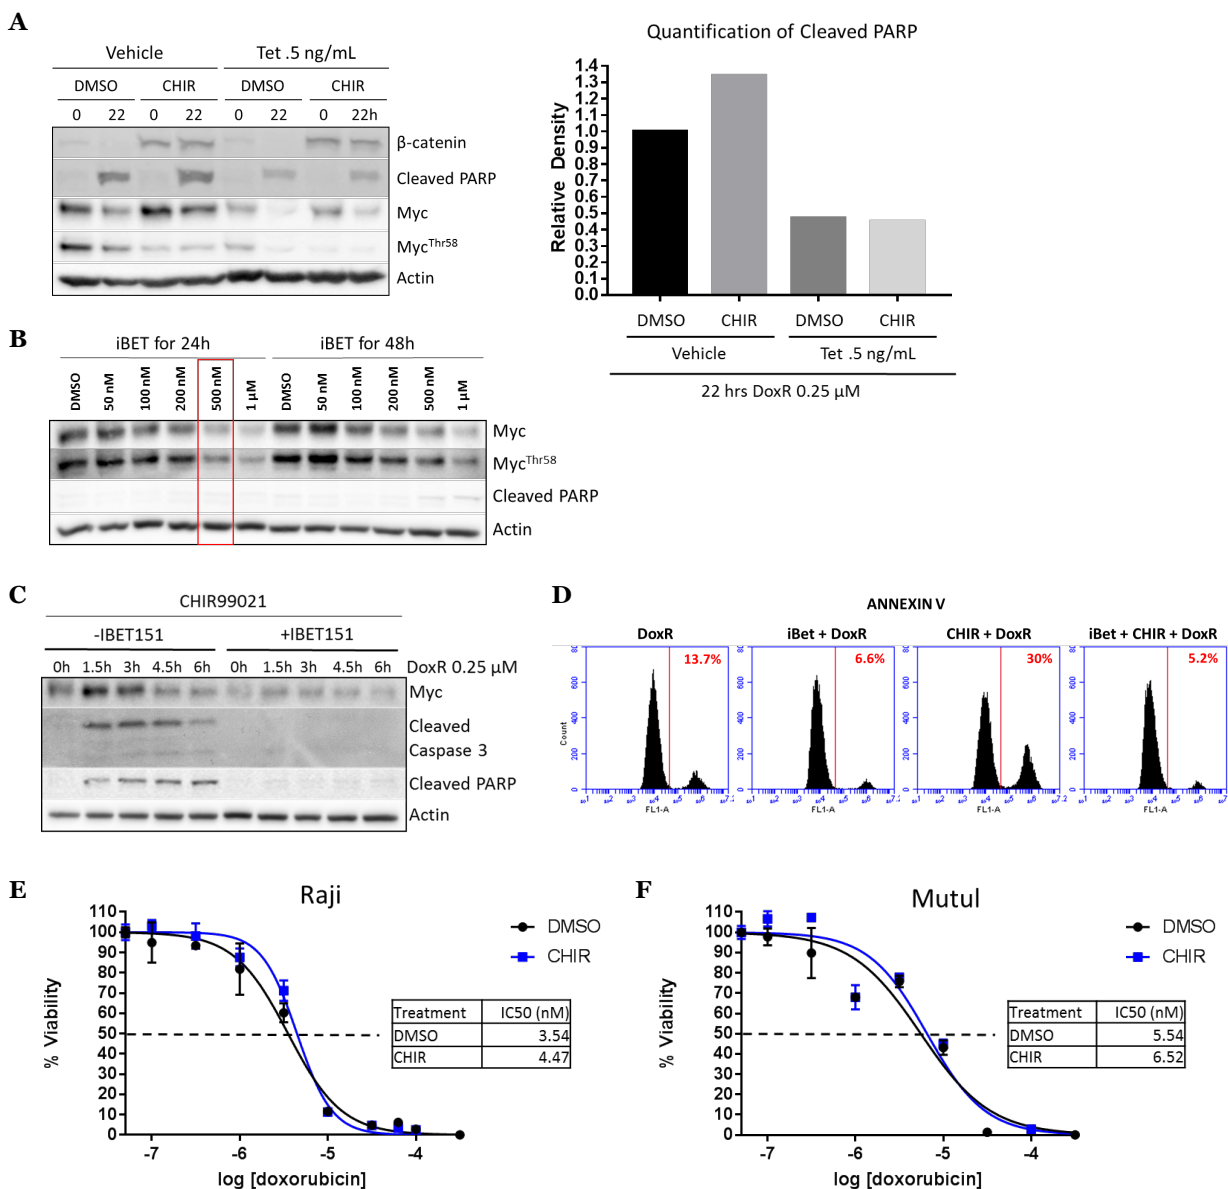

**Figure S3. Myc is a key target of GSK-3 $\beta$  responsible for CHIR99021-mediated sensitization to doxorubicin.** **A)** Left panel: p493-6 p53shRNA cells were treated with vehicle or tetracycline for 5 hours, followed by 2 hours or DMSO or CHIR and doxorubicin. Western blotting was done for  $\beta$ -catenin, cleaved PARP, Myc, Myc<sup>Thr58</sup> phosphorylation and actin control. Right panel: Levels of cleaved PARP were quantified with Image J software and plotted with GraphPad Prism. **B)** Ramos cells were treated with increasing concentrations of iBet-151 or DMSO for 24-48 hours. Myc repression and cell death was assayed by western blotting. **C)** Ramos cells were treated with 500 nM iBet-151 or DMSO for 24 hours followed by 2 hours of 3  $\mu$ M CHIR99021 and doxorubicin as indicated. Western blotting was performed for Myc and markers of cell death. **D)** Same experiment setup as in C). Annexin V expression was analyzed by flow cytometry after 6 hours of doxorubicin. Gates were drawn based on untreated cells. **E)** and **F)** Raji (E) and Mutl (F) cells were treated and cell survival assessed as in Fig. 2C.

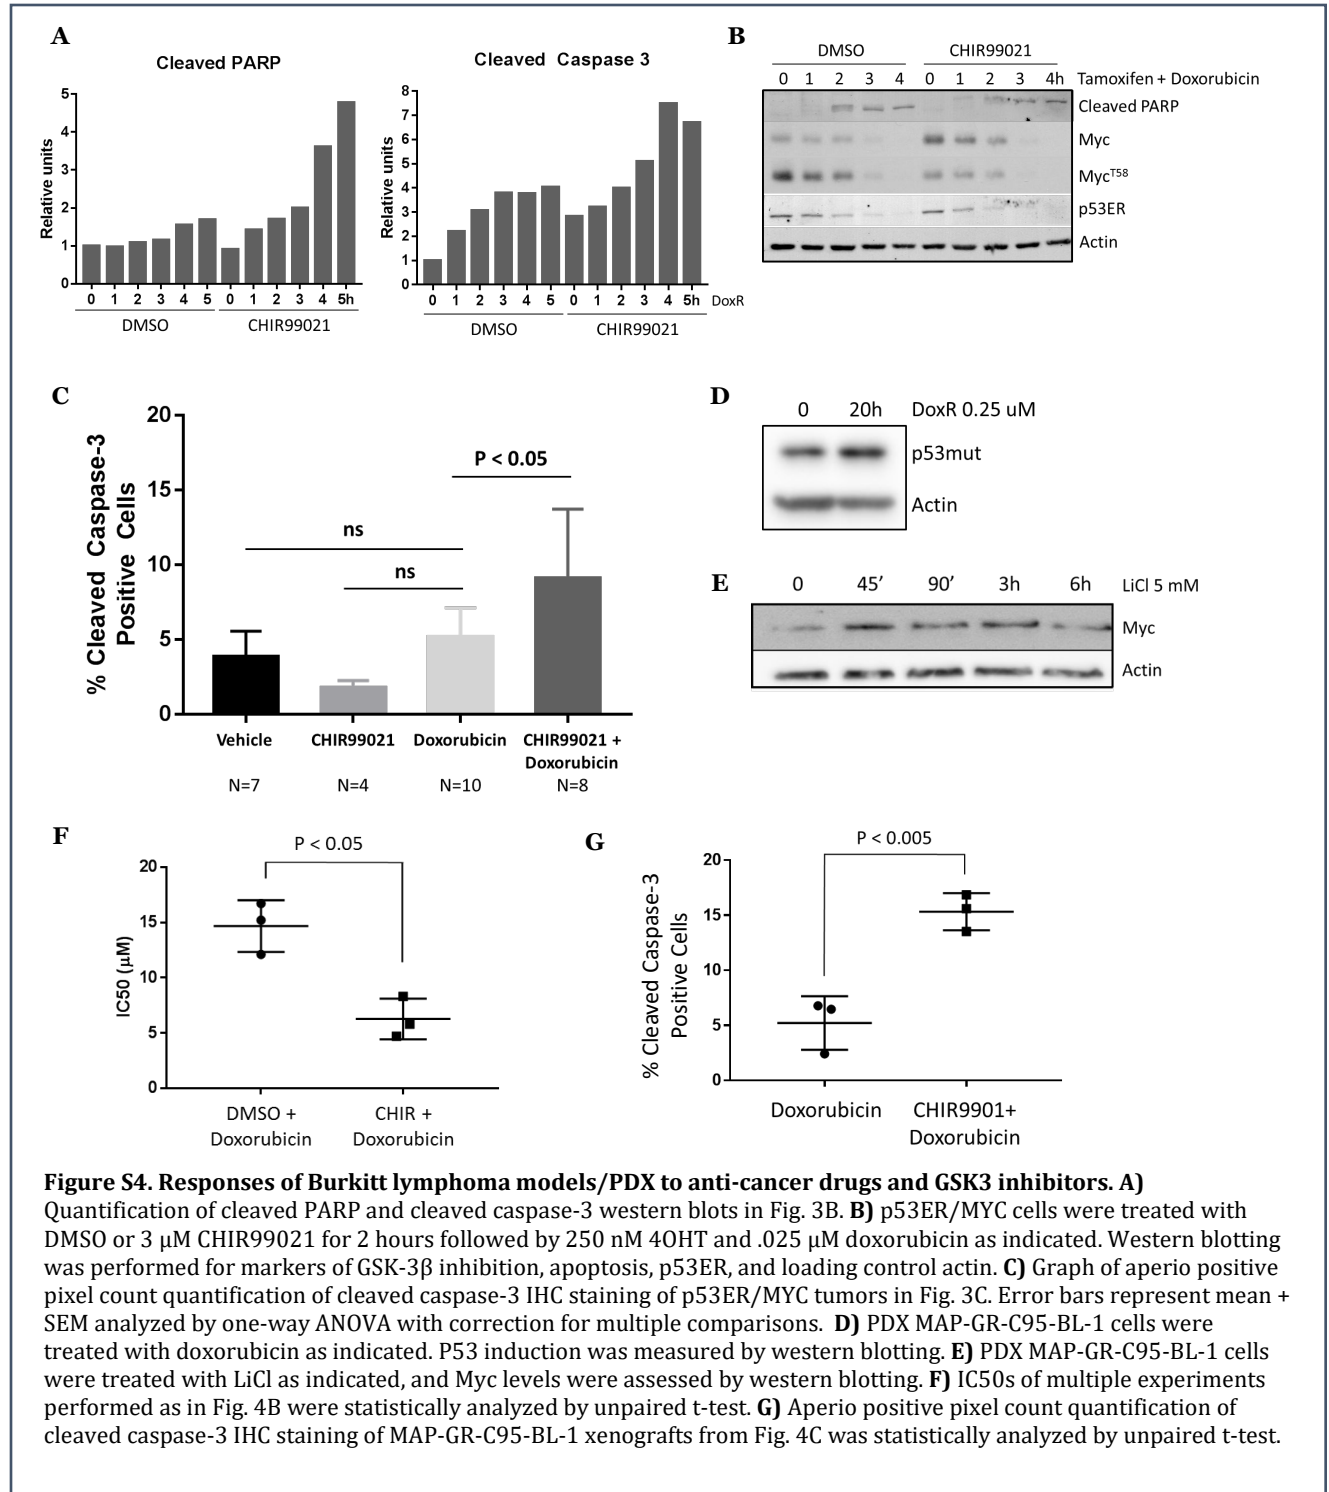

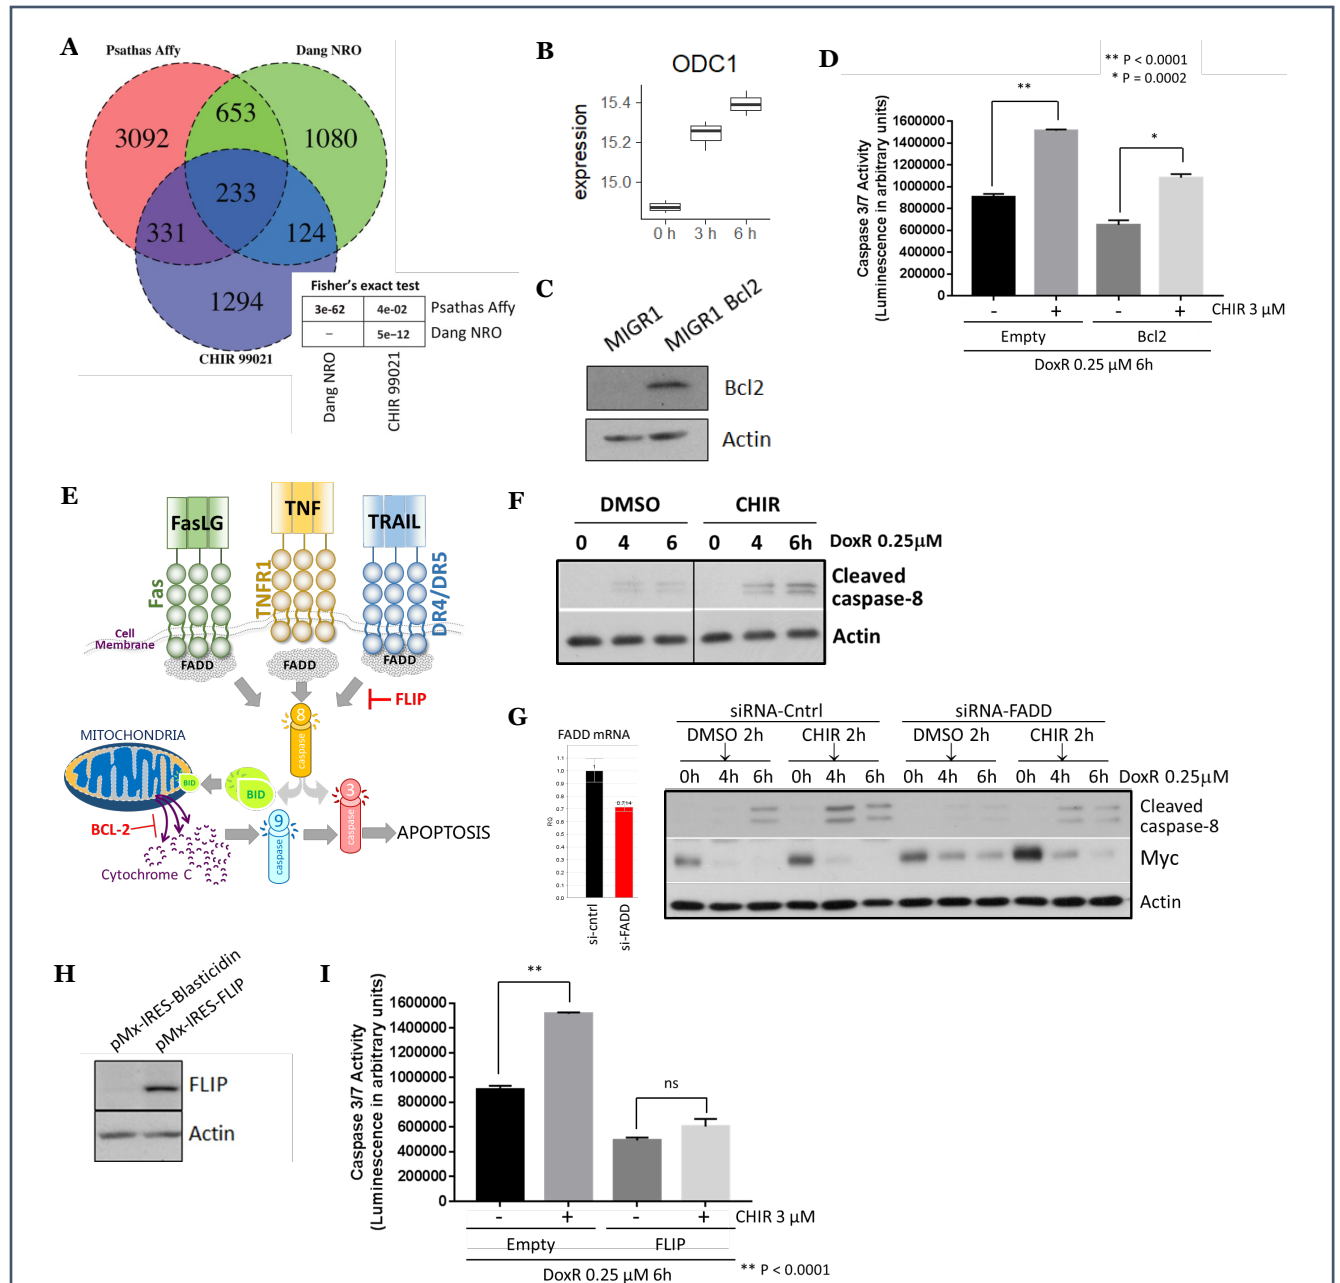

**Figure S5. Anti-GSK-3 $\beta$  adjuvant therapy efficacy is abolished by disrupting extrinsic, not intrinsic, apoptosis. A)** Venn diagrams showing overlap of activated genes between three datasets (CHIR99021, Psathas Affy, and Dang NRO). **B)** Change in expression level of ODC1 from RNA-sequencing. **C)** Western blotting confirming retroviral over-expression of Bcl-2 in Ramos cells. **D)** Caspase 3/7 Glo luminescence assay was performed on Ramos empty vector or Bcl-2 expressing cells treated as in Fig. 5B. Luminescence was plotted and statistically analyzed by unpaired t-test. **E)** Schematic of the extrinsic apoptotic pathway and its interplay with the intrinsic (mitochondrial) pathway. **F)** Ramos cells were treated for 2 hours with DMSO or 3  $\mu$ M CHIR99021 followed by doxorubicin. Cleaved caspase-8 levels were assessed by western blotting. **G)** Left panel: qRT-PCR demonstrating modest knockdown of FADD mRNA with FADD-directed siRNA. Right panel: Ramos cells were treated with control or FADD siRNA for 24 hours followed by DMSO or CHIR and doxorubicin as indicated. Western blotting was used to assess activation of caspase-8 and Myc levels. **H)** Western blotting confirming retroviral over-expression of FLIP in Ramos cells. **I)** Caspase 3/7 Glo luminescence assay was performed on Ramos empty vector or FLIP expressing cells treated as in Fig. 6C. Luminescence was plotted and statistically analyzed by unpaired t-test.

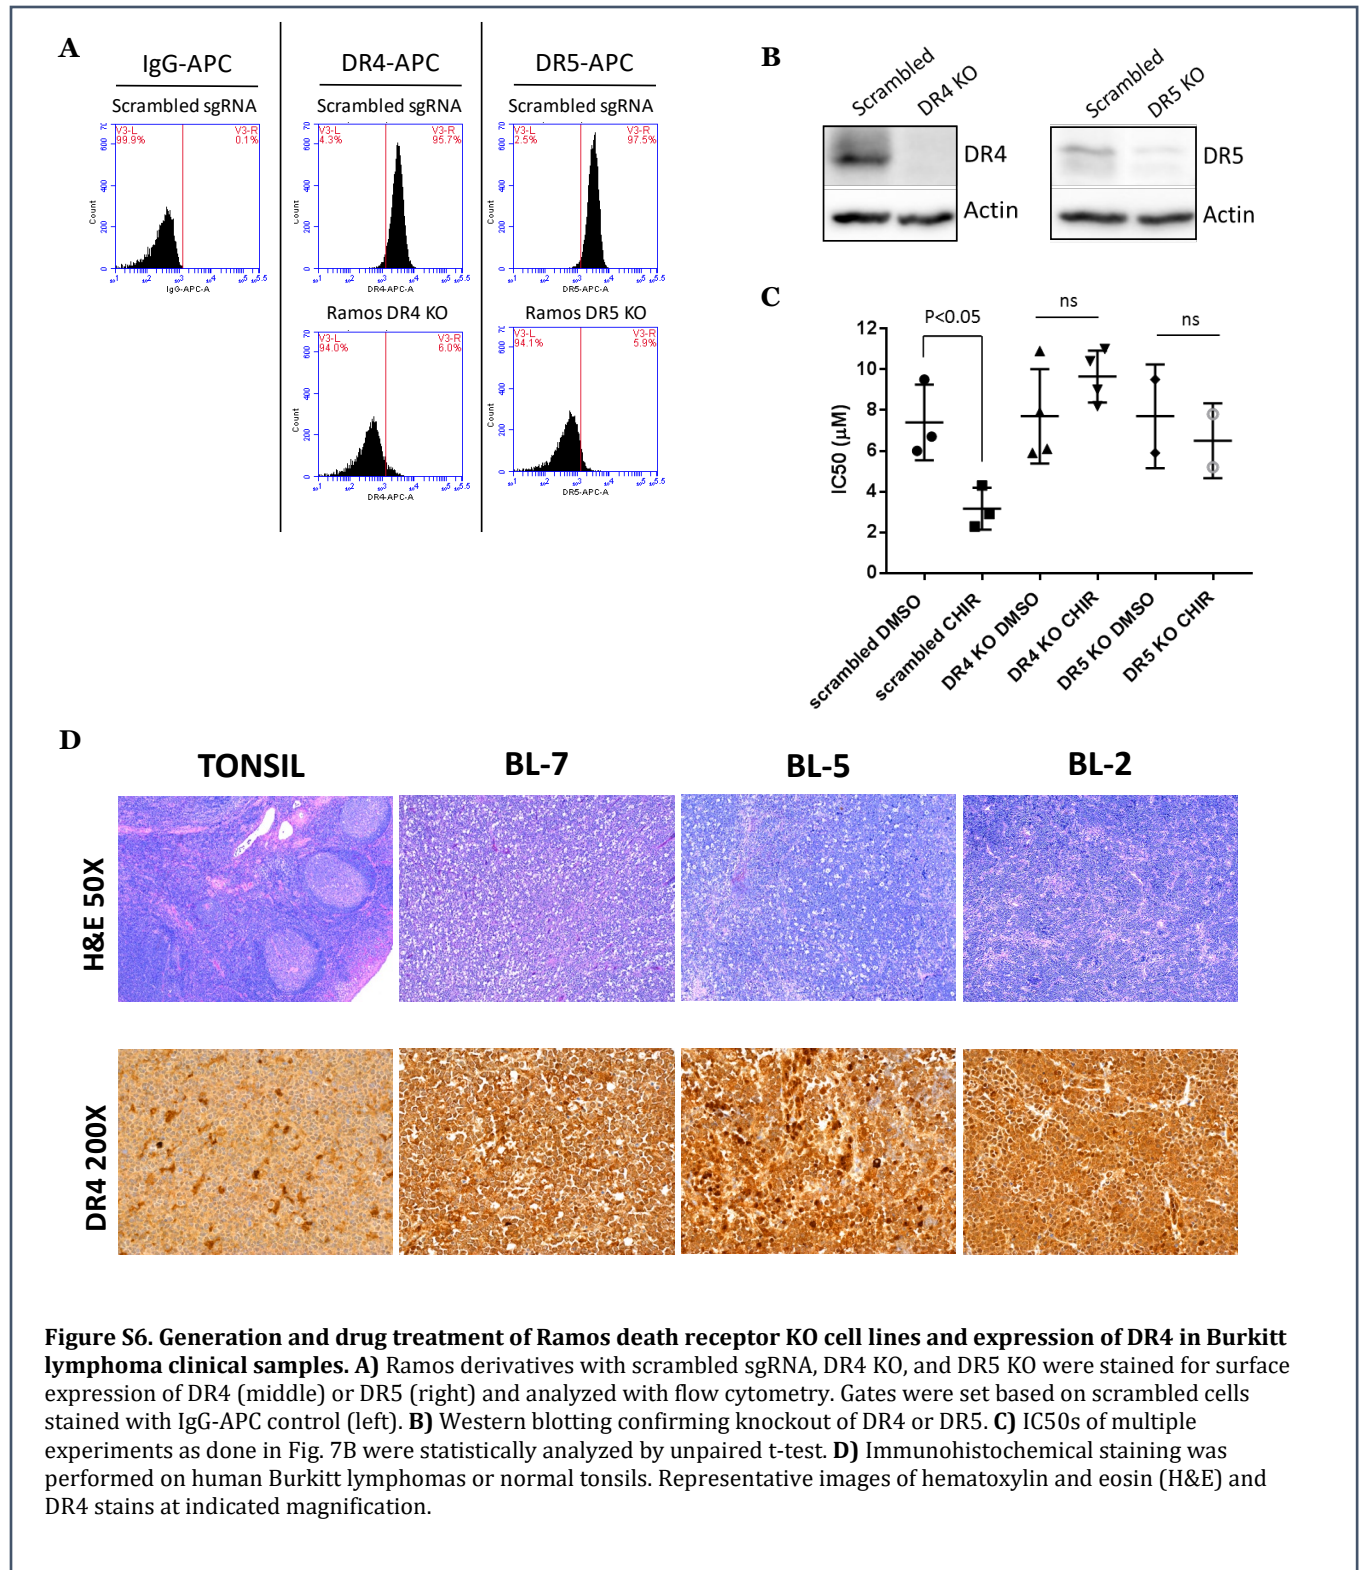

Supplement: NIHMS1060542-supplement-1060542_Sup_MOESM1.pdf [file NIHMS1060542-supplement-1060542_Sup_MOESM1.pdf]
